# Supplementary material for: Fitting Biochars and Activated Carbons from Residues of the Olive Oil Industry as Supports of Fe- Catalysts for the Heterogeneous Fenton-Like Treatment of Simulated Olive Mill Wastewater
Source: MDPI journal article supplement (doi:10.3390/nano10050876), 2020-05-01
Supplement: s1 [file s1]

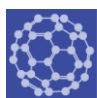

Supplementary Information

# Fitting biochars and activated carbons from residues of the olive oil industry as supports of Fe-catalysts for the heterogeneous Fenton-like treatment of simulated olive mill wastewater

Bruno M. Esteves <sup>1</sup>, Sérgio Morales-Torres <sup>2</sup>, Francisco J. Maldonado-Hódar <sup>2</sup> and Luis M. Madeira <sup>2</sup>

<sup>1</sup> LEPABE – Laboratory for Process Engineering, Environment, Biotechnology and Energy, Faculty of Engineering, University of Porto, Rua Dr. Roberto Frias, 4200-465 Porto, Portugal; [ega11010@fe.up.pt](mailto:ega11010@fe.up.pt) (B.M.E); [mmadeira@fe.up.pt](mailto:mmadeira@fe.up.pt) (L.M.M)

<sup>2</sup> Carbon Materials Research Group, Department of Inorganic Chemistry, Faculty of Sciences, University of Granada, Avda. Fuente Nueva, 18071 Granada, Spain; [semoto@ugr.es](mailto:semoto@ugr.es) (S.M-T), [fjaldon@ugr.es](mailto:fjaldon@ugr.es) (F.J.M-H)

Table S1. Chemical characteristics of the selected phenolic compounds.

| Name                | Chemical structure | Molecular formula                             | Molecular weight (g/mol) | pKa (at 25 °C) | Solubility in water (g/L) |
|---------------------|--------------------|-----------------------------------------------|--------------------------|----------------|---------------------------|
| Tyrosol             |                    | C <sub>8</sub> H <sub>10</sub> O <sub>2</sub> | 138.16                   | 10.20          | 25.3                      |
| Caffeic acid        |                    | C <sub>9</sub> H <sub>8</sub> O <sub>4</sub>  | 180.16                   | 4.62           | 1.6                       |
| Gallic acid         |                    | C <sub>7</sub> H <sub>6</sub> O <sub>5</sub>  | 170.12                   | 4.40           | 11.5                      |
| Protocatechuic acid |                    | C <sub>7</sub> H <sub>6</sub> O <sub>4</sub>  | 154.12                   | 4.48           | 18.2                      |
| Vanillic acid       |                    | C <sub>8</sub> H <sub>8</sub> O <sub>4</sub>  | 168.14                   | 4.16           | 1.5                       |

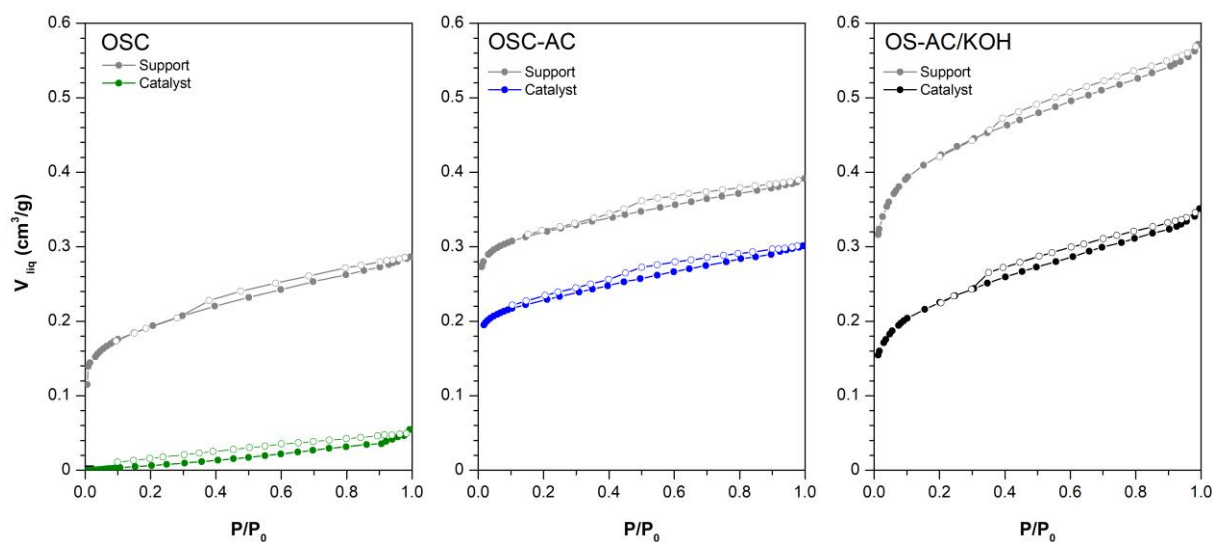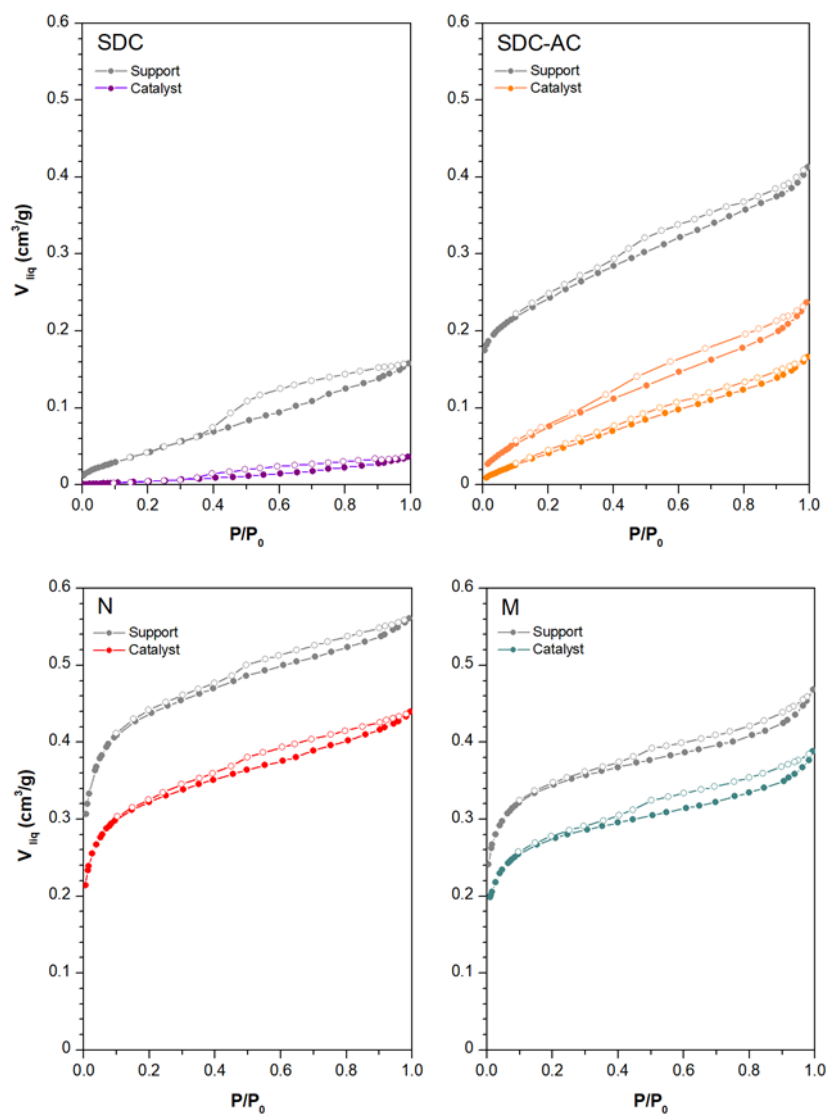

**Figure S1.** N<sub>2</sub> adsorption/desorption isotherms for the supports and corresponding Fe-catalysts tested.

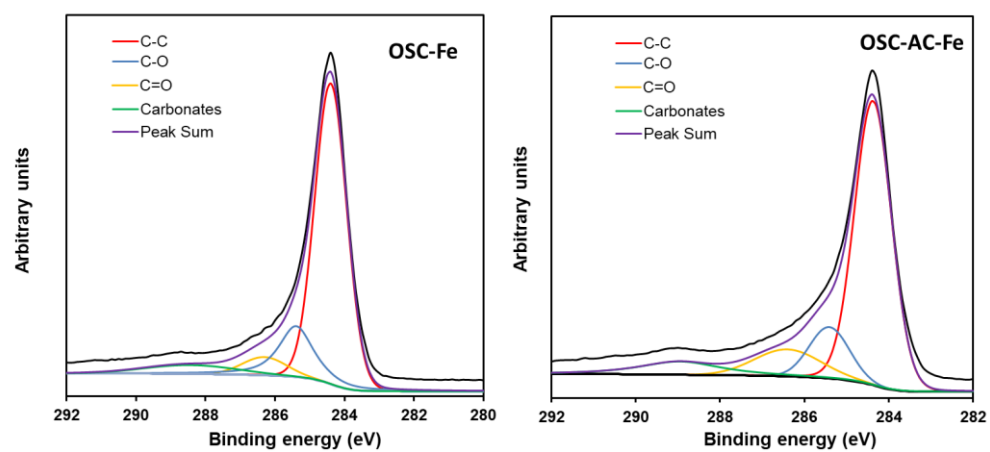

**Figure S2.** C1s spectral region of OSC-Fe and OSC-AC-Fe catalysts.

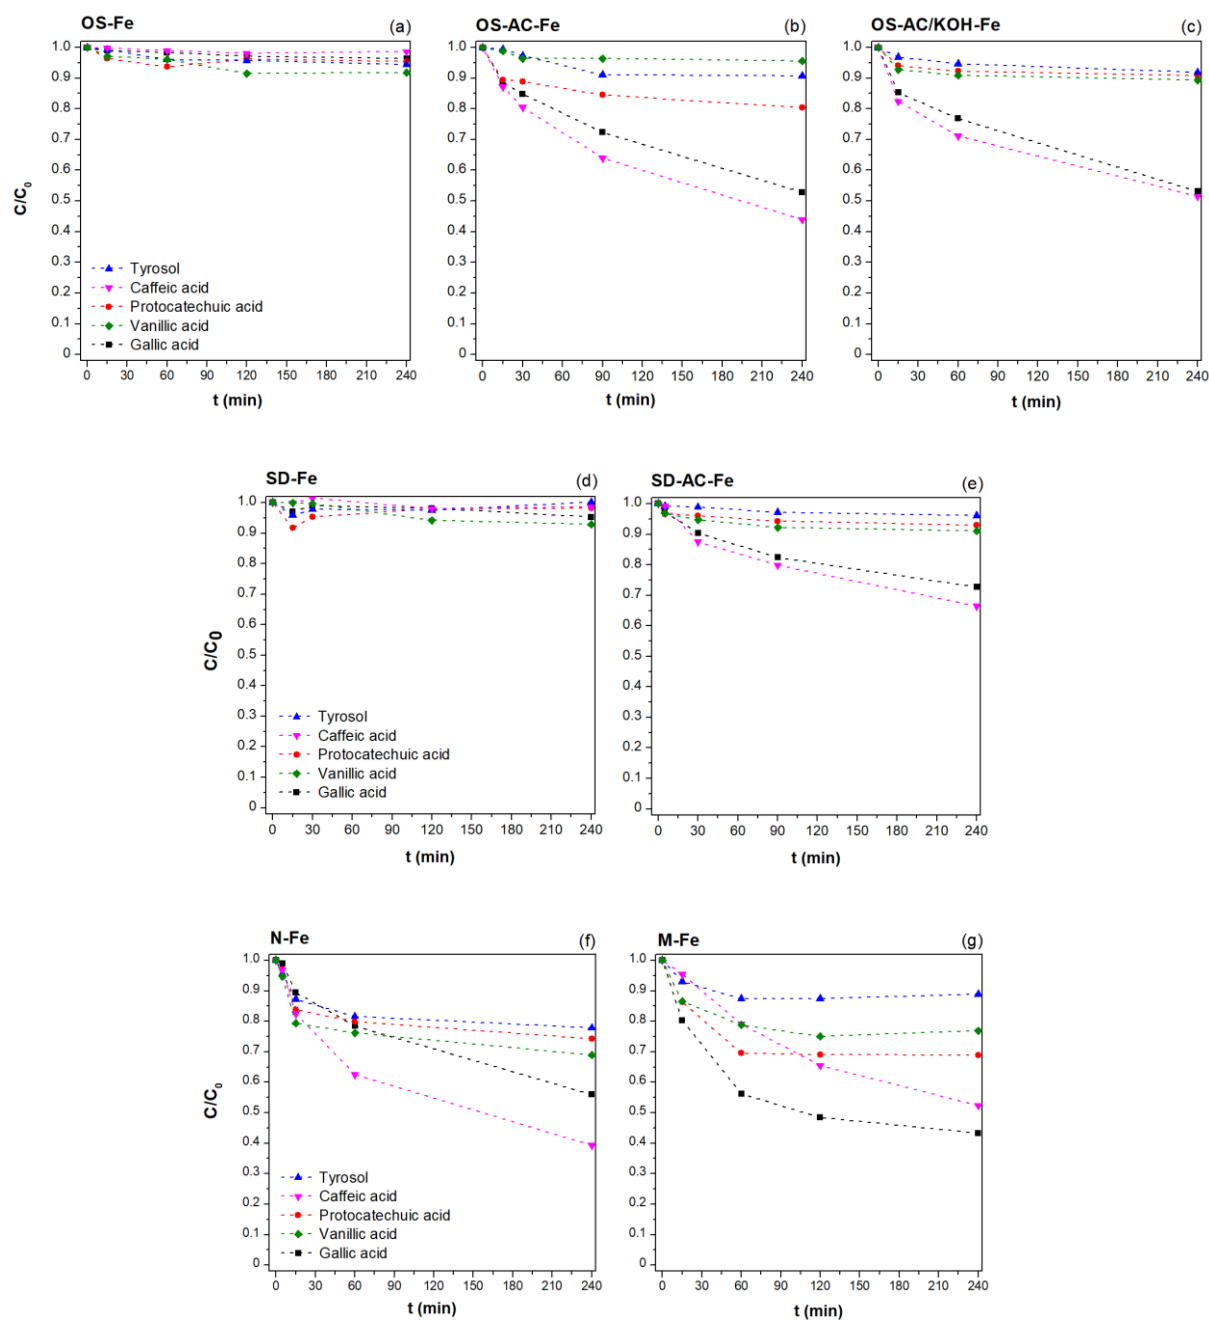

**Figure S3.** Adsorption runs using the catalysts prepared: removal of each phenolic compound ( $C/C_0$ ) over time. Experimental conditions:  $[Cat] = 0.5 \text{ g/L}$ ,  $T = 25^\circ\text{C}$ ,  $\text{pH} = \text{unadjusted}$ .

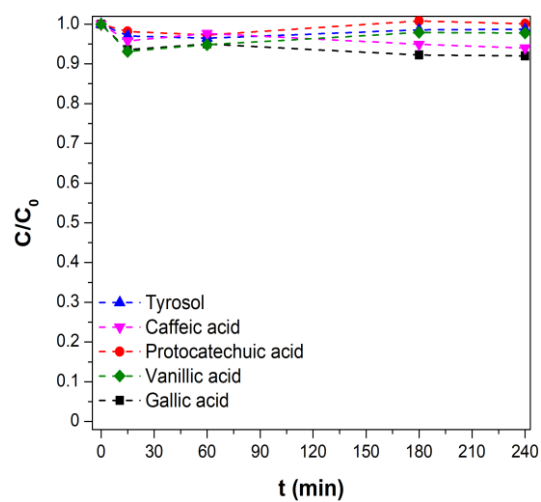

27

28 **Figure S4.** Catalytic effect of H<sub>2</sub>O<sub>2</sub> on the removal of phenolic compounds (C/C<sub>0</sub>) over time. Experimental  
 29 conditions: [H<sub>2</sub>O<sub>2</sub>] = 1 g/L, T = 25 °C, pH = unadjusted.

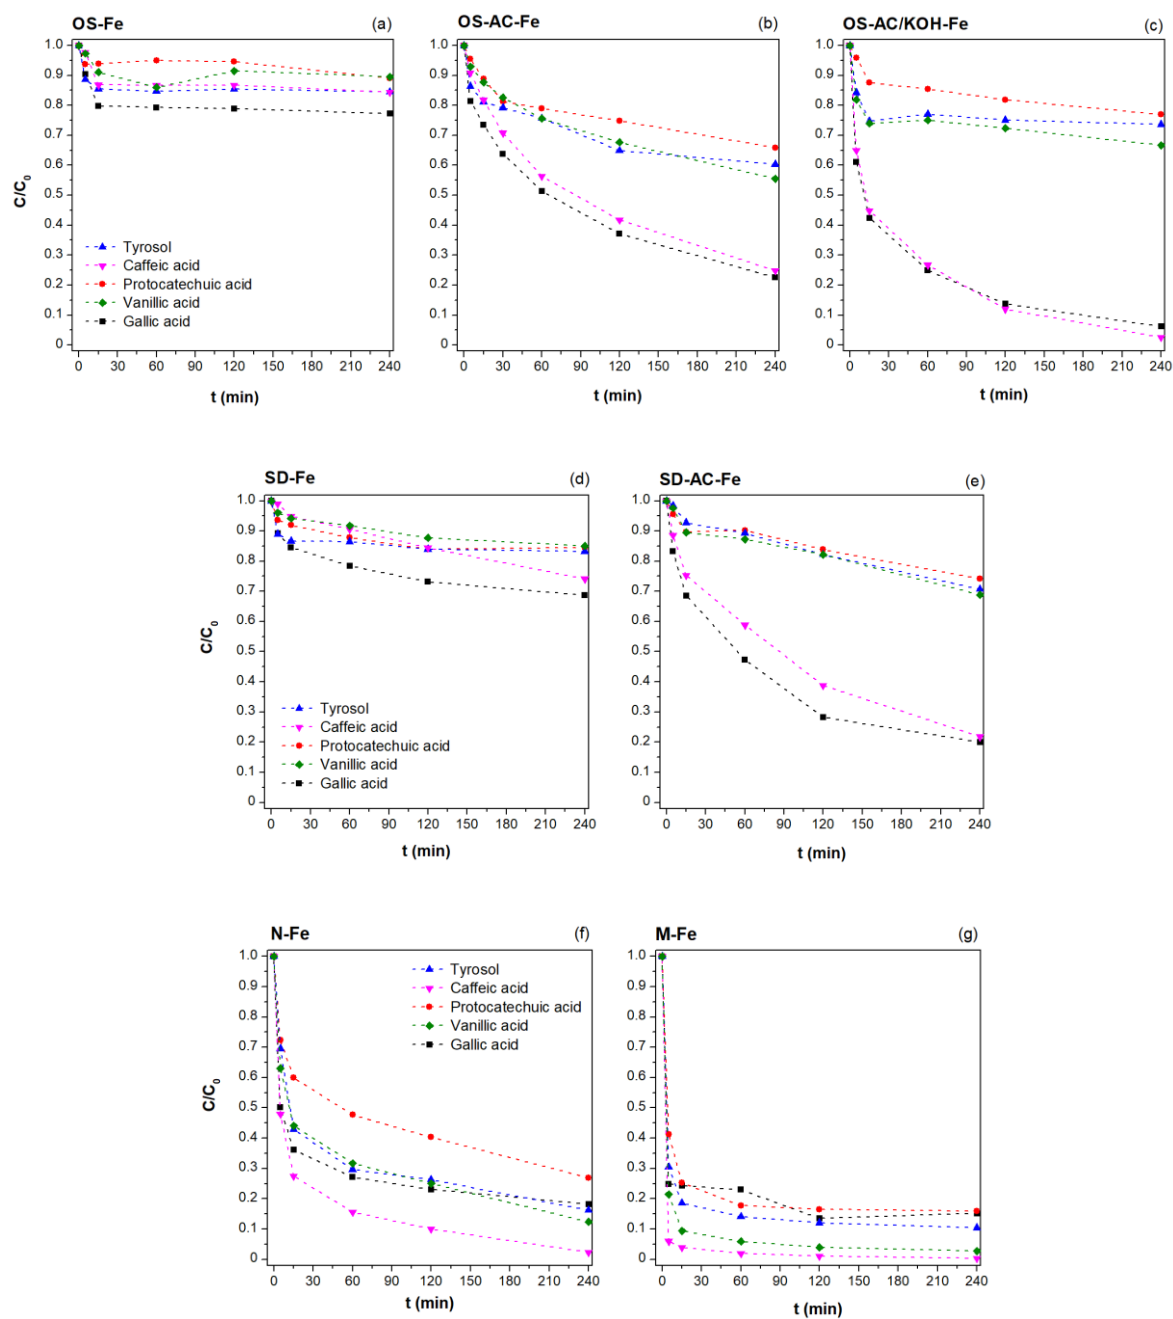

**Figure S5.** Catalytic runs using the Fe/AC catalysts prepared: removal of phenolic compounds ( $C/C_0$ ) over time. Experimental conditions:  $[H_2O_2] = 1$  g/L,  $[Cat] = 0.5$  g/L,  $T = 25$  °C, pH = unadjusted.
